# Supplementary material for: A Novel Treatment of Opioid Cravings With an Effect Size of .73 for Unilateral Transcranial Photobiomodulation Over Sham
Source: Front Psychiatry. 2020 Aug 19;11:827. doi: 10.3389/fpsyt.2020.00827 (PMC7466767; doi:10.3389/fpsyt.2020.00827)
Supplement: Supplementary file 2 [file Table_1.xlsx]

## Sheet: Hanna study complete data 6_21_
Pt # of Sheet1	Active-Sham=1; Sham-Active=0 of Sheet1	response group -1,1,2	response group 1 or 0	treater	date 1st visit	Gender m=1 f=2	Ethnicity	Ethnicity b=1,w=2,h=3	Age	Handedness	Handedness R=1,L=0	Education: grade	ACE	Suboxone	Employment	disability	Systems Review	Alcoghol y or n	Canabis y or n	Methamp	Amphet	Benzo	Heroin snort	Heroin IV	Heroin gms/d	heavy drug use	other opioids:	oxycodon amt/mg/d	other	amp	opi	met	bzo	coc	mtd	bup	mdma	THC	HDRS base wk1	HARS base wk1	PANAS: Pos base wk1	PANAS: Neg base wk1	PANAS P-N	OCS question 1 base wk1	OCS question 2 base wk1	OCS question 3 base wk1	Mean OCS base week 1	Wellbeing base wk1	Distress base wk1
1	1			F	03/08/2019 12:00:00 AM	2	w	2	31	left	0	12	2	y	cvs stock	1	anxiety	0	n	n	n	n	n	n	heavy	n	n	n	n	0	0	0	0	0	0	y	0	0	1	7	5	19	-14	3	4	4	3.66667
2	0	2	1	H	03/08/2019 12:00:00 AM	1	b	1	50	right	1	12	2	n	store clerk	0		1	y	y	n	n	n	n		y	n	n	y	0	0	0	0	y	0	0	0	y	2	1	18	9	9	6	6	6	6
3	1	-1	0	F	10/08/2019 12:00:00 AM	1	b	1	55	left	0	14	1	n	part time, not sure what	0	wnl	3	y	n	n	y	n	n	Y-iv 1gm/d	y	y	n	360 mg/d	0	y	0	0	0	y	0	0	0	2	0	17	6	11	7	6	9	7.33333
4	1	1	0	H	03/08/2019 12:00:00 AM	1	b	1	55	right	1	12	5	n	disability	1	ptsd	1	y	n	n	n	n	n		y	y	percocet 2 weeks ago	n	0	0	0	0	y	0	0	0	y	2	3	23	5	18	5	9	9	7.66667
5	0	2	1	F	03/08/2019 12:00:00 AM	2	w	2	62	right	1	14	6	n	disability	1	copd, ptsd	0	y	n	y	y	n	n		n	y	n 20mg rarely	n	y	y	0	0	0	0	0	0	0	41	28	13	16	-3	8	9	8	8.33333
6	0	-1	0	H	24/08/2019 12:00:00 AM	1	b	1	53	Right	1	14	1	n	carpenter	0	depression	1	y	n	n	n	y	n	.5g 1 week ago	y	y	percocet 3 weeks ago	n	0	0	0	0	0	0	0	0	0	2	4	25	5	20	0	7	7	4.66667	9	0
7	1			F	10/08/2019 12:00:00 AM	1	b	1	50	right	1	4	3	n	no	1		3						y		y				0	0	0	0	0	y	0	y	0	9	6	11	6	5	7	7	8	7.33333	4	4
8	0	1	0	H	10/08/2019 12:00:00 AM	1	w	2	43	right	1	10	8	y	no	1	depression	1	y	n	y	n	y	n	4 days ago	n	n	n	n	0	0	0	0	y	0	y	0	y	22	28	21	13	8	7	9	9	8.33333	5	1
9	0	2	1	H	10/08/2019 12:00:00 AM	1	b	1	34	right	1	13	1	n	private security	0		0	y	n	n	n	n	n	n	n	y	percocet 1 month ago	n	0	0	0	0	0	0	0	0	0	5	2	7	6	1	5	0	8	4.33333	9	4
10	0	2	1	F	10/08/2019 12:00:00 AM	1	w	2	40	right	1	10	6	y	yes	1	ptsd,anx,dep	0	y	n	y	n	n		n none for 3-4 yrs	n	n	n		0	0	0	0	0	0	0	y	0	24	27	12	9	3	5	6	7	6	7	9
11	0	-1	0	F	24/08/2019 12:00:00 AM	1	b/h	3	55	right	1	13	1	n	Y 30h/wk carpentry	0	anxiety, enue, insom							n		n		n	n	0	0	0	0	0	0	0	0	0	18	8	18	10	8	5	7	8	6.66667	7	4
12	0	2	1	F	24/08/2019 12:00:00 AM	1	b	1	54	left	0	13	1	n	n on SSI	1	s/p rectal surgery					y				n		none last wk; used in past		0	0	0	y	y	0	0	0	0	3	3	16	5	11	5	9	9	7.66667	9	0
13	0	1	0	H	24/08/2019 12:00:00 AM	1	w	2	57	Right	1	12	4	n	greeter	0	HIV	1	n	n	n	n	n			n	n			0	0	0	0	0	0	0	0	0	18	10	15	7	8	6	7	9	7.33333	6	5
14	0	2	1	F	31/08/2019 12:00:00 AM	1	w	2	35	right	1	16	7	y	no	1	ptsd,anx,dep,add		y	n	y	y	n	n		n	n		past MDMA	0	0	0	y	0	0	y	0	0	35	32	12	13	-1	3	9	7	6.33333	4	7
15	0	-1	0	H	31/08/2019 12:00:00 AM	1	w	2	45	Right	1	14	0	n	FedEx	0		1	n	n	n	n	n	n	n	n	y	Past in june as prescribed for knee pain		0	0	0	0	0	0	0	0	0	3	1	18	7	11	6.5	5	6	5.83333	5	3
16	1	2	1	F	31/08/2019 12:00:00 AM	1	b	1	58	right	1	14	8	n	hospital transport	0	4lb wt loss, anxiety	1	y	n	n	n	y	n	2 gm/wk	y	y		n	0	0	0	0	y	0	y	0	y	3	3	22	7	15	7	5	9	7	8	1
17	0	-1	0	H	28/09/2019 12:00:00 AM	1	w	2	41	right	1	14	2	n	Construction	0	Substance abuse disorder, anxiety, depression	0	n	n	n	n	n	n	none since April	n	n	n	inhalants	0	0	0	0	y	y	0	0	0	2	3	15	5	10	3	6	7	5.3	8	1
18	1	1	0	F	28/09/2019 12:00:00 AM	1	b	1	63	right	1	10	9	n	artist	1	ptsd, chronic headaches	0	n	n	n	n	n	n	n	n	y		n	0	y	0	0	0	0	0	0	0	22	30	19	14	5	7	5	9	7	2	5
19	1	1	0	H	28/09/2019 12:00:00 AM	1	w	2	54	right	1	12	3	n	no	1	anxiety, depression, turrets	1	y	y	y	y	n	y	1 gm/wk	y	y	past		0	y	y	0	0	0	y	0	0	9	8	14	15	-1	9	9	9	9	7	6
20	1			H	28/09/2019 12:00:00 AM	1	w	2	62	right	1	12	1	n	Welder	0		1	y	n	n	y	y	n	1 bag/wk	y	y		n	0	0	0	0	0	0	y	0	0	6	7	18	7	11	7	4	5	5.33333	8	4
21	1	1	0	F	28/09/2019 12:00:00 AM	1	b Somale	1	45	right	1	14	9	y	disability	1	severe PTSD, HIV, Diabetes	3	y	n	n	y	n	y	2.5 gm/wk	y	n		n	0	y	0	0	0	0	y	0	0	35	51	10	21	-11	9	9	9	9	5	8
22	0	-1	0	H	28/09/2019 12:00:00 AM	1	w	2	36	right	1	12	1	n	Temp worker	0		1	y	n	n	n	n	n	n	n	y	6-9 pills totalling about 80mg/day	n	0	0	0	0	0	0	0	0	0	8	6	20	5	15	8	9	7	8	6	2
[truncated: 213 more columns]
